# Supplementary material for: Whey Protein Combined with Low Dietary Fiber Improves Lipid Profile in Subjects with Abdominal Obesity: A Randomized, Controlled Trial
Source: PubMed Central journal article supplement (PMC6770182; doi:10.3390/nu11092091), 2019-09-04
Supplement: nutrients-11-02091-s001.pdf [file nutrients-11-02091-s001.pdf]

**Figure S1.** Postprandial triglyceride responses (mmol/L) after intake of a high-fat meal at week 0 and week 12 by intervention group

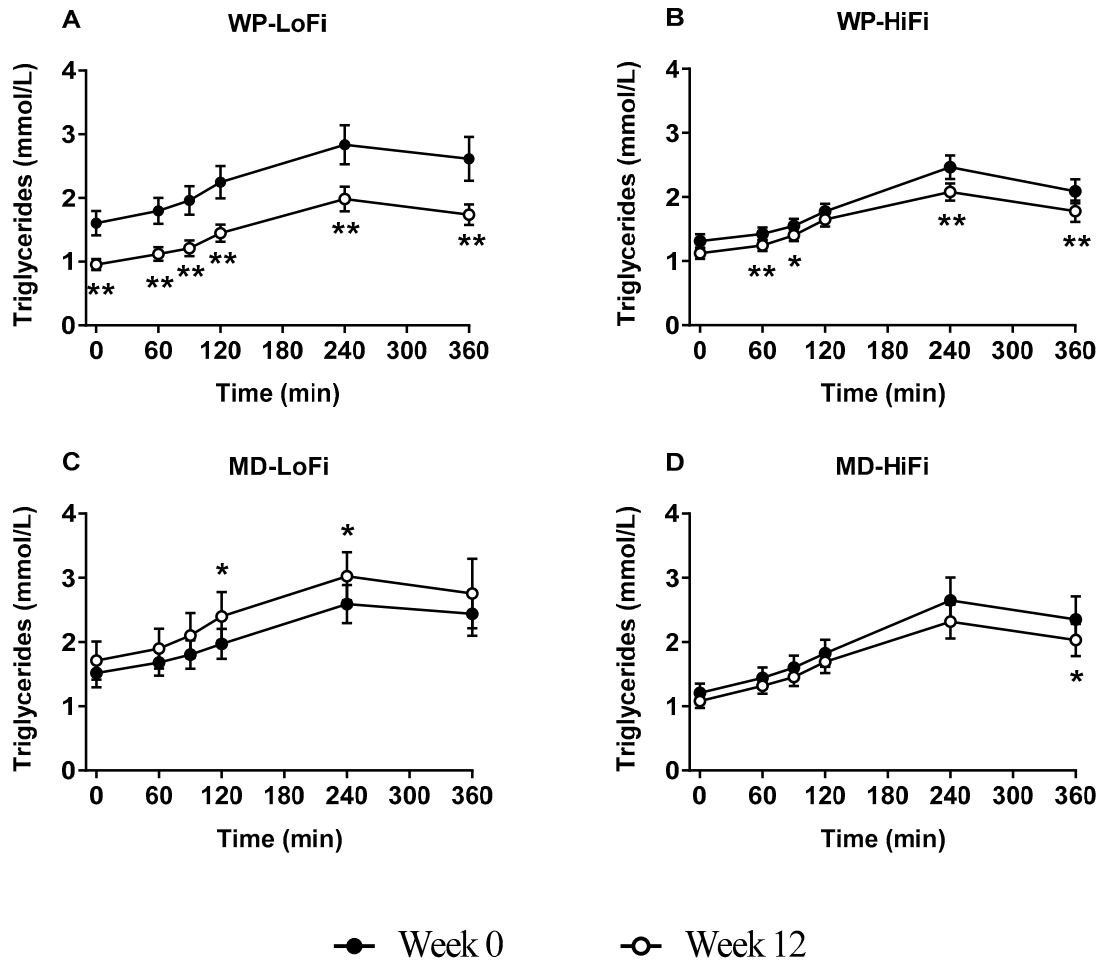

Values are means (SEM) at given time points. Significant difference between week 0 and week 12 at any given time point is indicated by \*  $P < 0.05$ , \*\*  $P < 0.01$ . Analyzed by repeated-measures ANOVA. HiFi, high fiber; LoFi, low fiber; MD, maltodextrin; WP, whey protein.
